# Supplementary material for: 3D Bayesian Inversion of Potential Fields: The Quebec Oka Carbonatite Complex Case Study
Source: MDPI journal article supplement (doi:10.3390/geosciences12100382), 2022-10-13
Supplement: s1 [file s1]

Archive with 1 entries (1 files):
- geosciences-1806316-supplementary.pdf
